# Supplementary material for: Simulated sunlight photocatalytic degradation of aqueous p-nitrophenol and bisphenol A in a Pt/BiOBr film-coated quartz fiber photoreactor
Source: Royal Society of Chemistry journal article supplement (doi:10.1039/c5dt00417a), 2015-01-01
Supplement: c5dt00417a1.pdf [file c5dt00417a1.pdf]

**Electronic supplementary information (ESI) for**

**“Simulated sunlight photocatalytic degradation of aqueous *p*-nitrophenol and bisphenol A in the Pt/BiOBr film-coated quartz fiber photoreactor”**

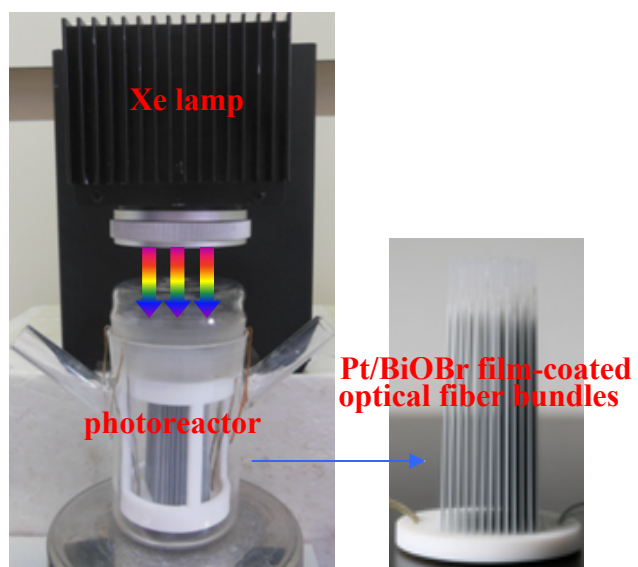

**Fig. S1.** Self-made Pt/BiOBr film-coated quartz fiber photoreactor system.

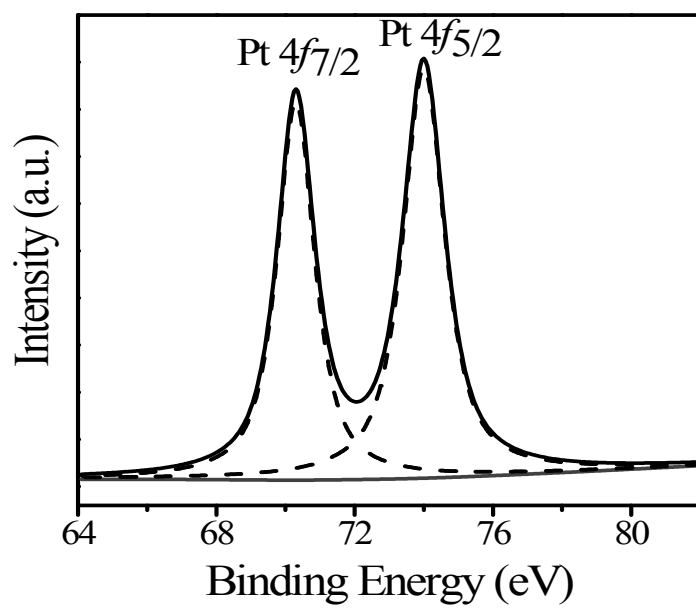

**Fig. S2.** XPS survey spectra of the Pt/BiOBr-1.99 powder in the Pt 4f binding energy region.

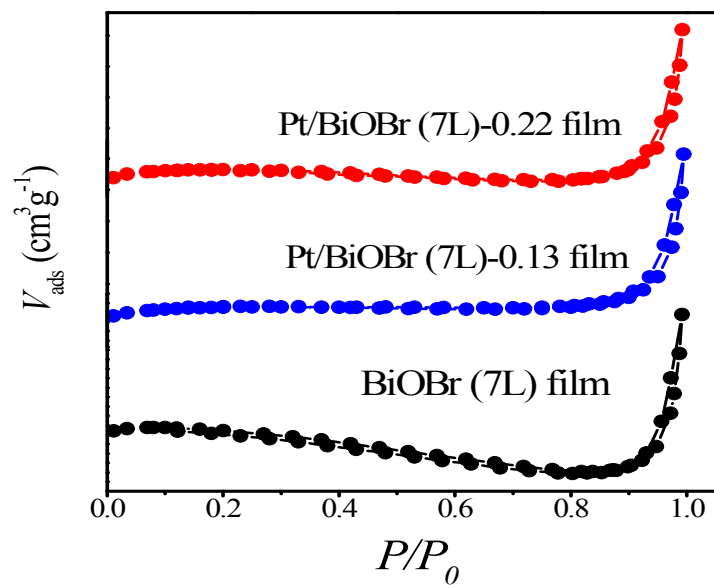

**Fig. S3.** Nitrogen gas adsorption-desorption isotherms of BiOBr (7L) film and Pt/BiOBr (7L) film.

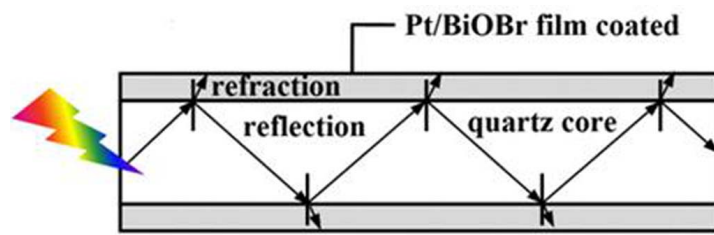

**Fig. S4** The light transmission in a Pt/BiOBr film-coated quartz fiber bundle.

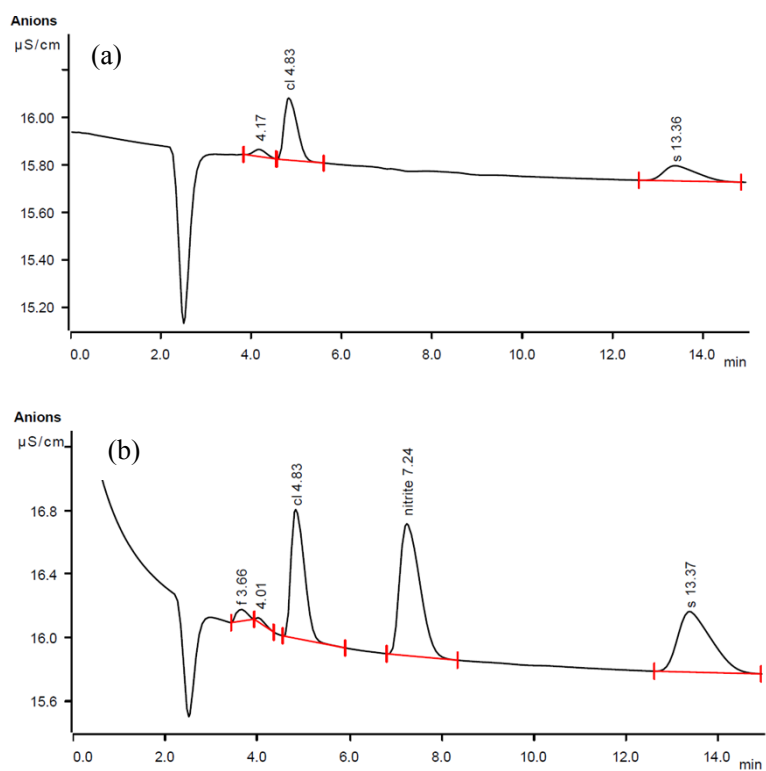

**Fig. S5** IC elution curves recorded during photocatalytic degradation of PNP over as-prepared Pt/BiOBr-027 (a) before PNP degradation, and (b) after simulated sunlight irradiating for 60 min. Metrohm 881 Compact ion chromatography (IC) equipped with a Metrosep A SUPP4 anion column and conductivity detector.  $\text{Na}_2\text{CO}_3$  ( $1.8 \text{ mmol L}^{-1}$ ) and  $\text{NaHCO}_3$  ( $0.17 \text{ mmol L}^{-1}$ ) are used as the mobile phase.
